# Supplementary material for: Investigating the Salivary Biomarker Profile in Obesity: A Systematic Review
Source: Springer Nature journal article supplement (doi:10.1007/s13679-025-00618-y), 2025-03-28

# Investigating the Salivary Biomarker Profile in Obesity: A Systematic Review

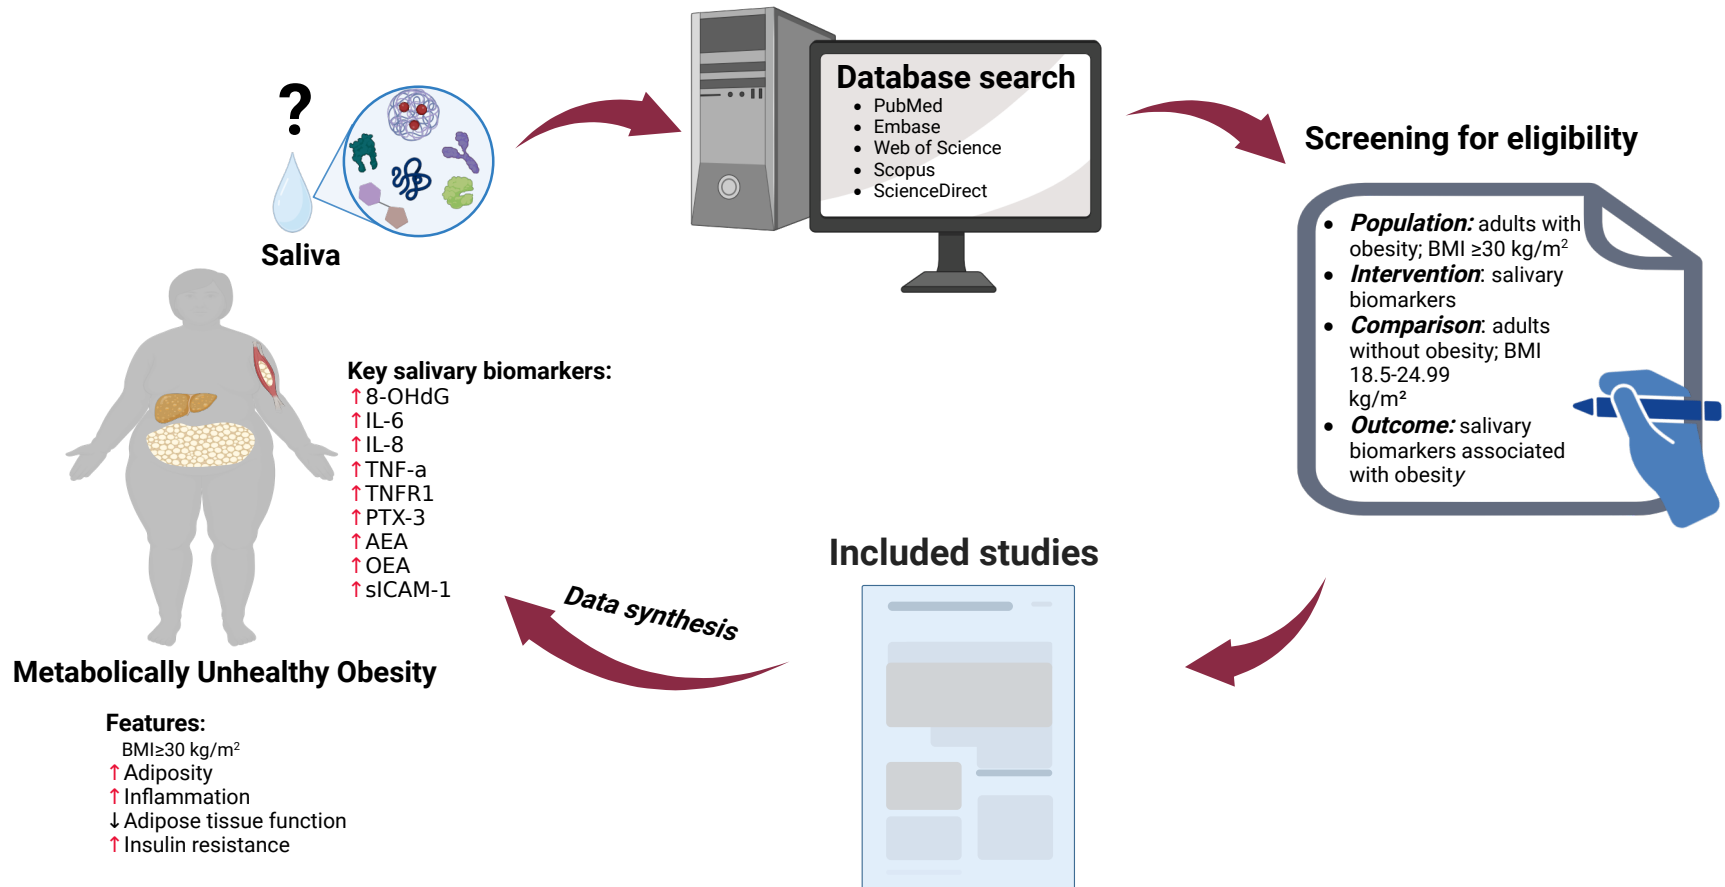

Supplement: MOESM1 [file 13679_2025_618_MOESM1_ESM.pdf]
